# Supplementary material
Source: PubMed Central journal article supplement (PMC9400479)
Supplement: jvi.00480-22-s0002.pdf [file jvi.00480-22-s0002.pdf]

**TABLE S1 Cryo-EM data collection and refinement statistics.**

|                                       | OS           | OS-<br>553-49 | Apo-S<br>D614G | S-553-15           |              |         | S-553-60       |                |        |
|---------------------------------------|--------------|---------------|----------------|--------------------|--------------|---------|----------------|----------------|--------|
|                                       | Trimer       | Monomer       | Trimer         | Dimer<br>of trimer | Trimer       | NR15    | 1-up<br>trimer | 2-up<br>trimer | NR60   |
| <b>Data collection and processing</b> |              |               |                |                    |              |         |                |                |        |
| Magnification                         | 81,000       |               | 81000          |                    | 81,000       |         |                | 105,000        |        |
| Voltage (kV)                          | 300          |               | 300            |                    | 300          |         |                | 300            |        |
| Total dose (e-/Å <sup>2</sup> )       | 58           |               | 58             |                    | 61           |         |                | 60             |        |
| Defocus range (µm)                    | -1.2 to -2.5 |               | -1.2 to -2.5   |                    | -1.2 to -2.5 |         |                | -1.2 to -2.5   |        |
| Pixel size (Å)                        | 1.064        |               | 1.064          |                    | 1.07         |         |                | 0.82           |        |
| Symmetry imposed                      | C1           |               | C1             |                    | C1           |         |                | C1             |        |
| Final particles (no.)                 | 128,589      | 597,461       | 2,001,157      | 188,942            | 377,884      | 199,441 | 88,701         | 99,762         | 88,701 |
| Map resolution (Å)                    | 3.40         | 4.06          | 2.70           | 4.47               | 3.45         | 3.80    | 3.25           | 3.25           | 3.35   |
| <b>Refinement</b>                     |              |               |                |                    |              |         |                |                |        |
| <b>R.m.s. deviations</b>              |              |               |                |                    |              |         |                |                |        |
| Bond lengths (Å)                      | 0.002        | 0.001         | 0.003          | 0.002              | 0.002        | 0.003   | 0.002          | 0.002          | 0.002  |
| Bond angles (°)                       | 0.615        | 0.398         | 0.680          | 0.437              | 0.535        | 0.695   | 0.406          | 0.429          | 0.458  |
| <b>Validation</b>                     |              |               |                |                    |              |         |                |                |        |
| MolProbity score                      | 2.45         | 2.45          | 2.35           | 2.17               | 2.23         | 2.64    | 2.10           | 2.24           | 2.29   |
| Clashscore                            | 7.53         | 10.22         | 6.44           | 5.82               | 5.80         | 6.92    | 6.56           | 7.05           | 6.74   |
| Rotamer outlier (%)                   | 5.36         | 3.78          | 5.57           | 3.89               | 4.31         | 8.82    | 4.23           | 4.57           | 4.60   |
| <b>Ramachandran plot</b>              |              |               |                |                    |              |         |                |                |        |
| Favored (%)                           | 92.17        | 92.04         | 93.41          | 93.93              | 93.46        | 90.29   | 96.19          | 95.01          | 93.67  |
| Allowed (%)                           | 7.83         | 7.96          | 6.59           | 6.06               | 6.54         | 9.71    | 3.81           | 4.99           | 6.33   |
| Disallowed (%)                        | 0.00         | 0.00          | 0.00           | 0.01               | 0.00         | 0.00    | 0.00           | 0.00           | 0.00   |
| <b>EMDB</b>                           | 32901        | 32651         | 32902          | 32638              | 32639        | 32641   | 32646          | 32647          | 32648  |
| <b>PDB</b>                            | 7WZ1         | 7WOG          | 7WZ2           | 7WO4               | 7WO5         | 7WO7    | 7WOA           | 7WOB           | 7WOC   |

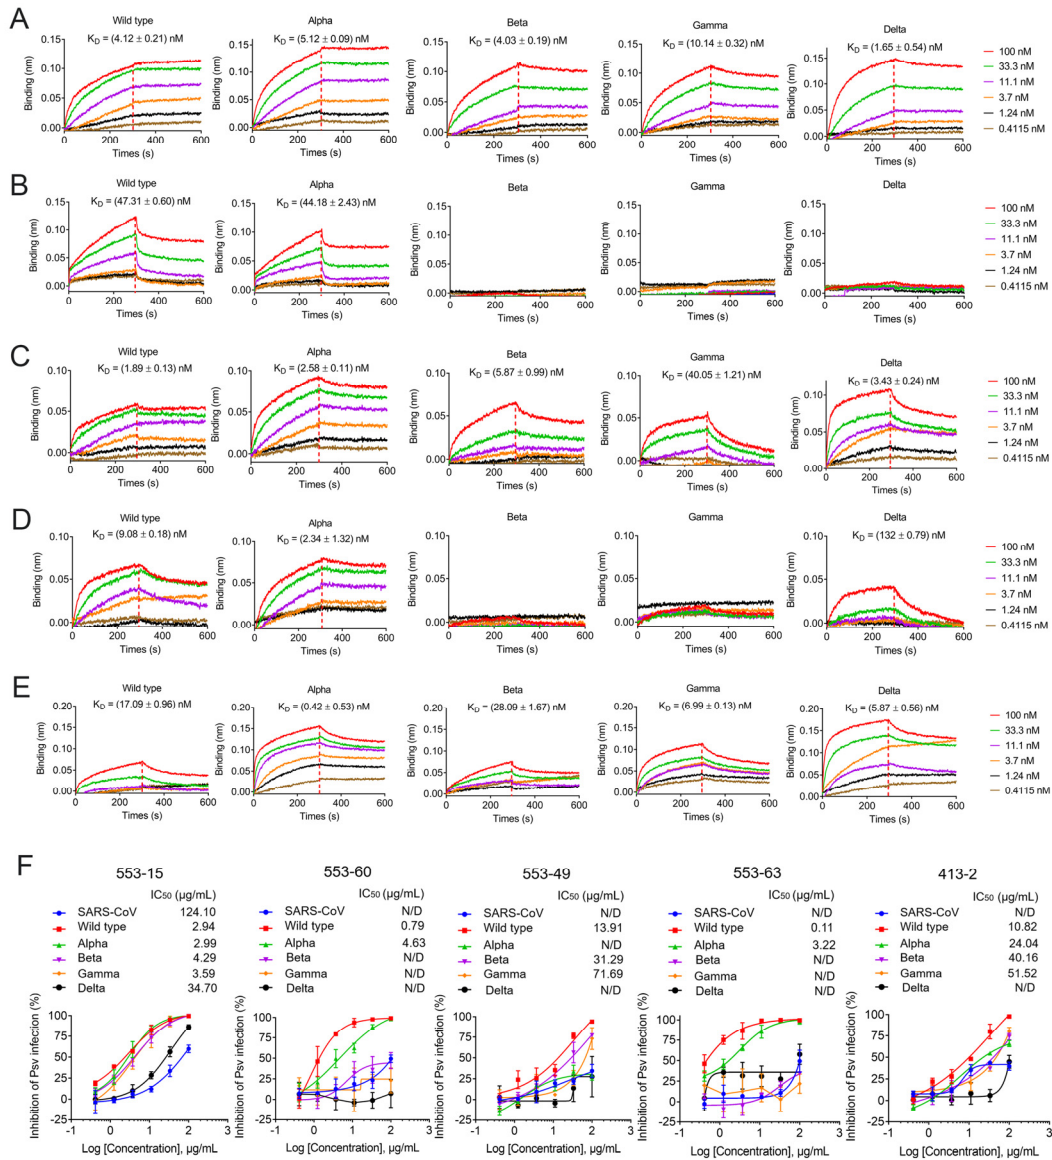

**FIG S1 Accommodation of monoclonal antibodies to SARS-CoV-2 VOCs.** (A-E) BLI sensorgrams and kinetics of monoclonal antibodies binding to spike protein of SARS-CoV-2 variants including: 553-15 (A), 553-60 (B), 553-49(C), 553-63 (D) and 413-2 (E). (F) Neutralizing activity of IgG against SARS-CoV-2, SARS-CoV-2 variants (Alpha, Beta, Gamma and Delta), and SARS-CoV pseudoviruses (PSV). Data are shown as mean  $\pm$  SEM. N/D, not detected.

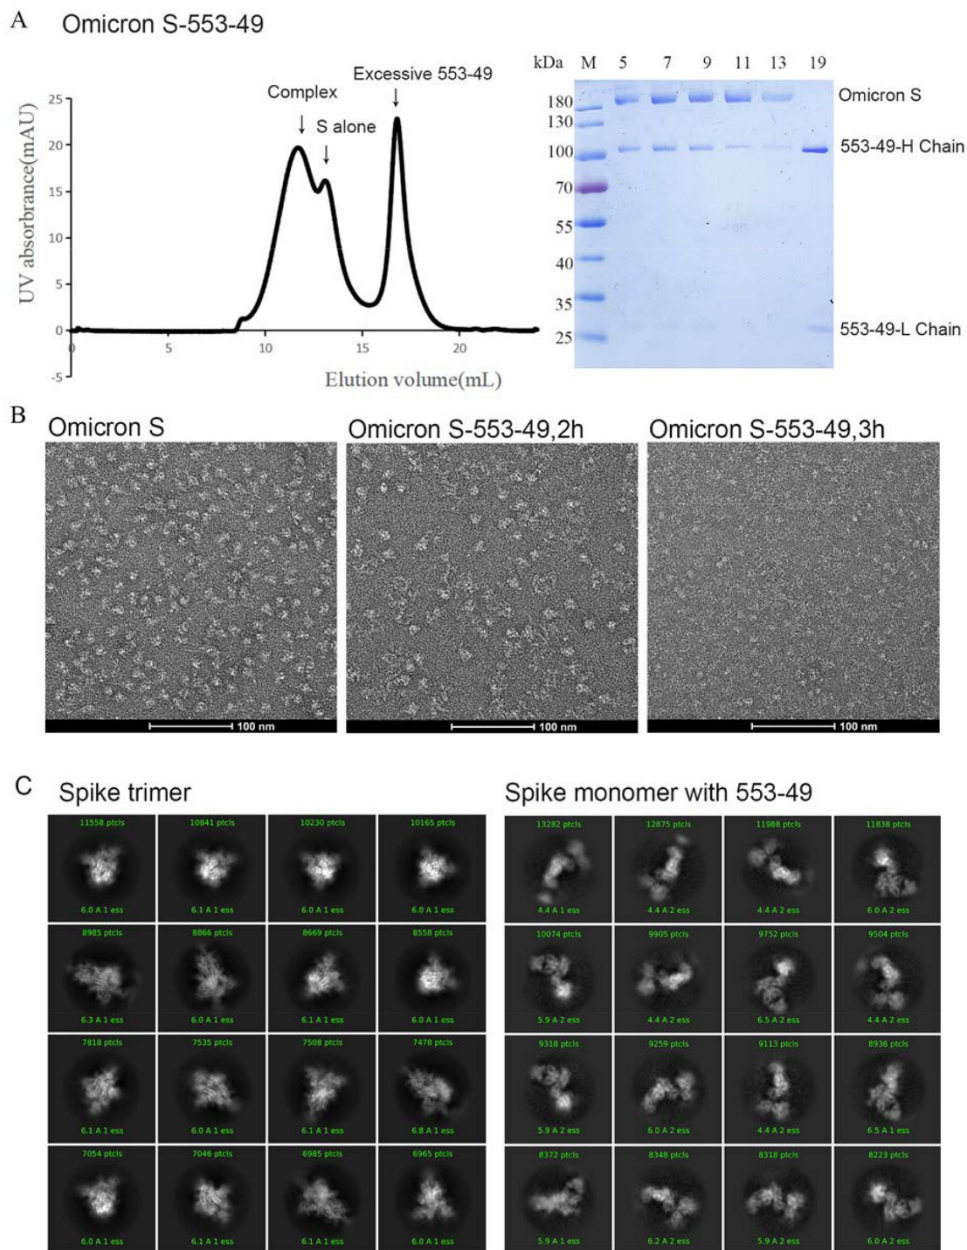

**FIG S2 IgG 553-49 binds Omicron S trimer and disassembles it.** (A) Purification of Omicron S-553-49 (OS-553-49) complex. The gel-filtration curve showed that 553-49 and S protein can form complex. (B) Negative stain images of OS-553-49 complex, showing that incubating Omicron S with 553-49 induced S trimer disassembling. (C) The 2D classification result of cryo-EM data collected using complex incubated for 1.5h. Two major classes were classified: the S trimer (left) and the S monomer with 553-49 (right).

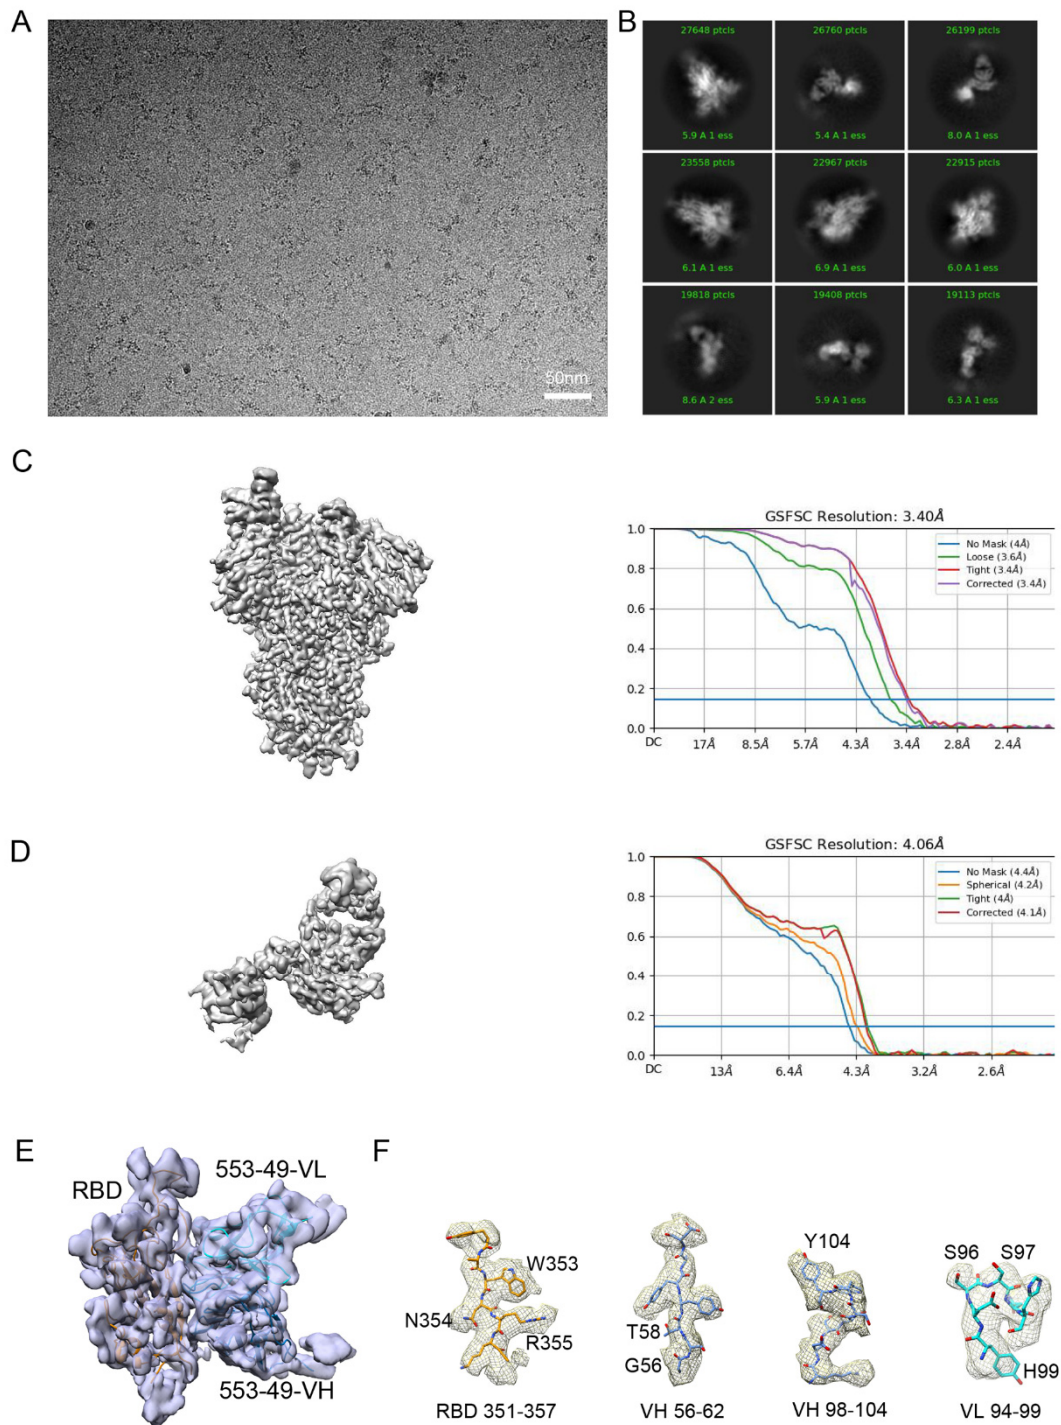

**FIG S3 Cryo-EM data processing of SARS-CoV-2 Omicron S in complex with 553-49 (OS-553-49).** (A) Representative electron micrograph of OS-553-49. (B) 2D classification result of OS-553-49. (C) The reconstruction map of Omicron S trimer and its gold-standard FSC curve from cryoSPARC. (D) The reconstruction map of OS-553-49 and its gold-standard FSC curve from cryoSPARC. (E) Cryo-EM map of RBD-553-49. (F) Representative density maps of residues around the interface.

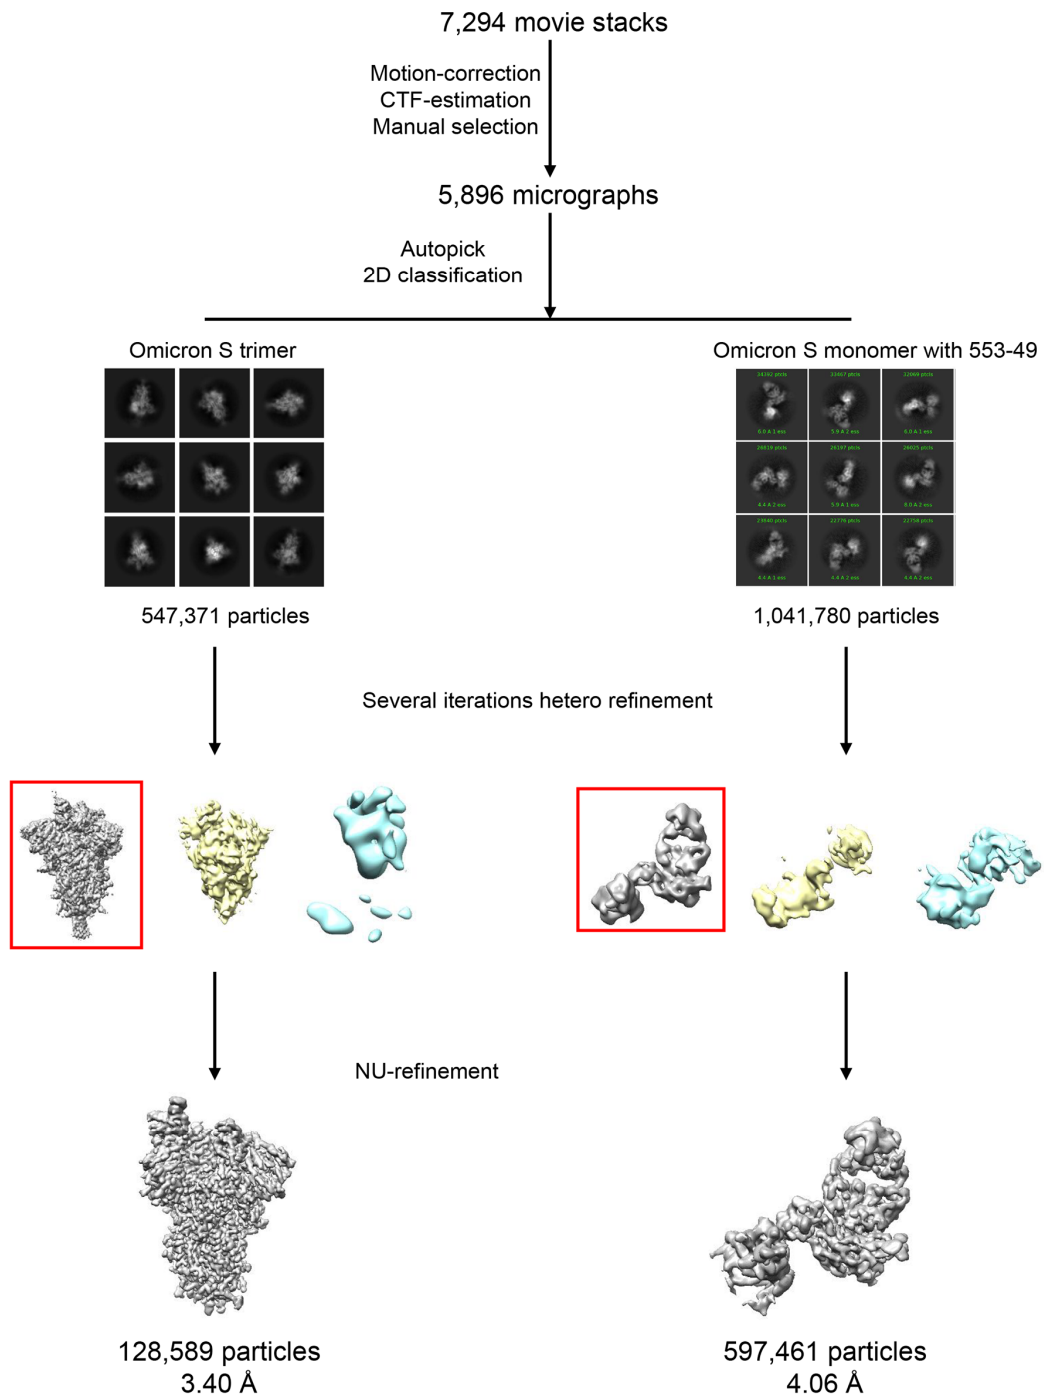

**FIG S4 Data processing flowchart of Omicron S trimer and OS-553-49.**

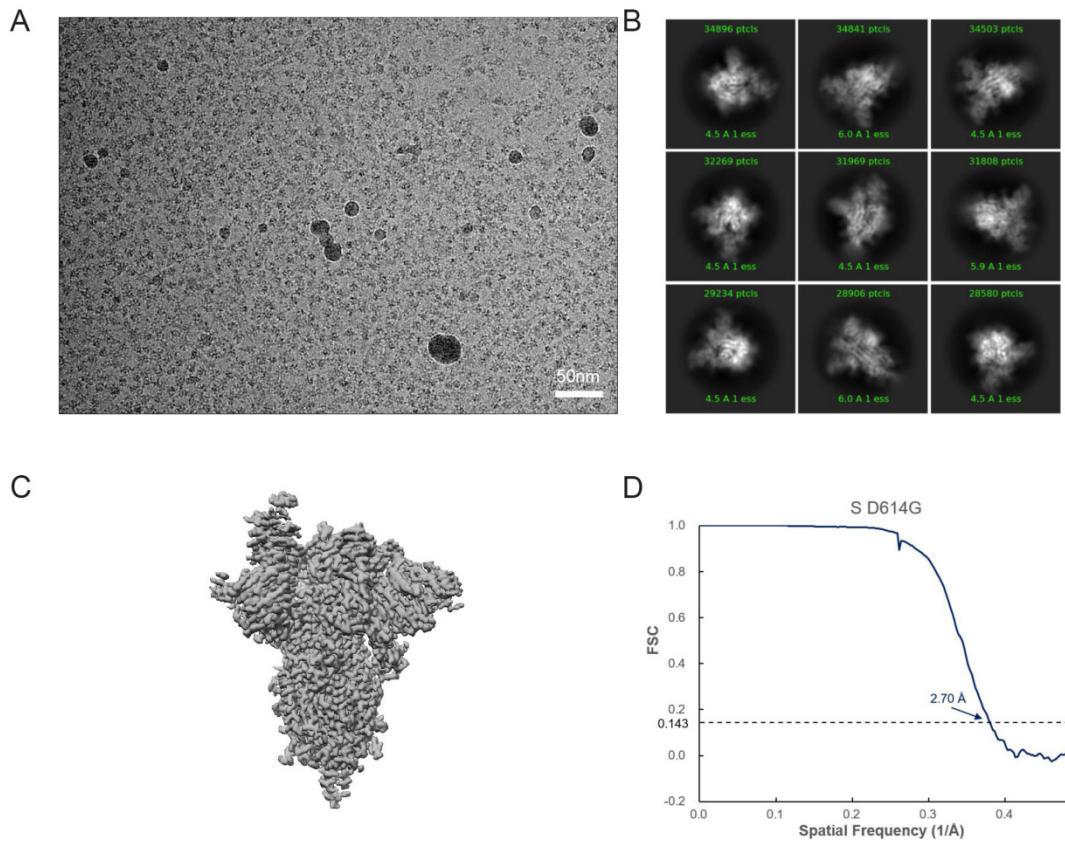

**FIG S5 Cryo-EM data processing of SARS-CoV-2 D614G S.** (A) Representative electron micrograph of SARS-CoV-2 S. (B) 2D classification results of SARS-CoV-2 S. (C) The reconstruction map of SARS-CoV-2 S. (D) Gold-standard FSC curves for this structure. The 0.143 cut-off is indicated by a horizontal dashed line.

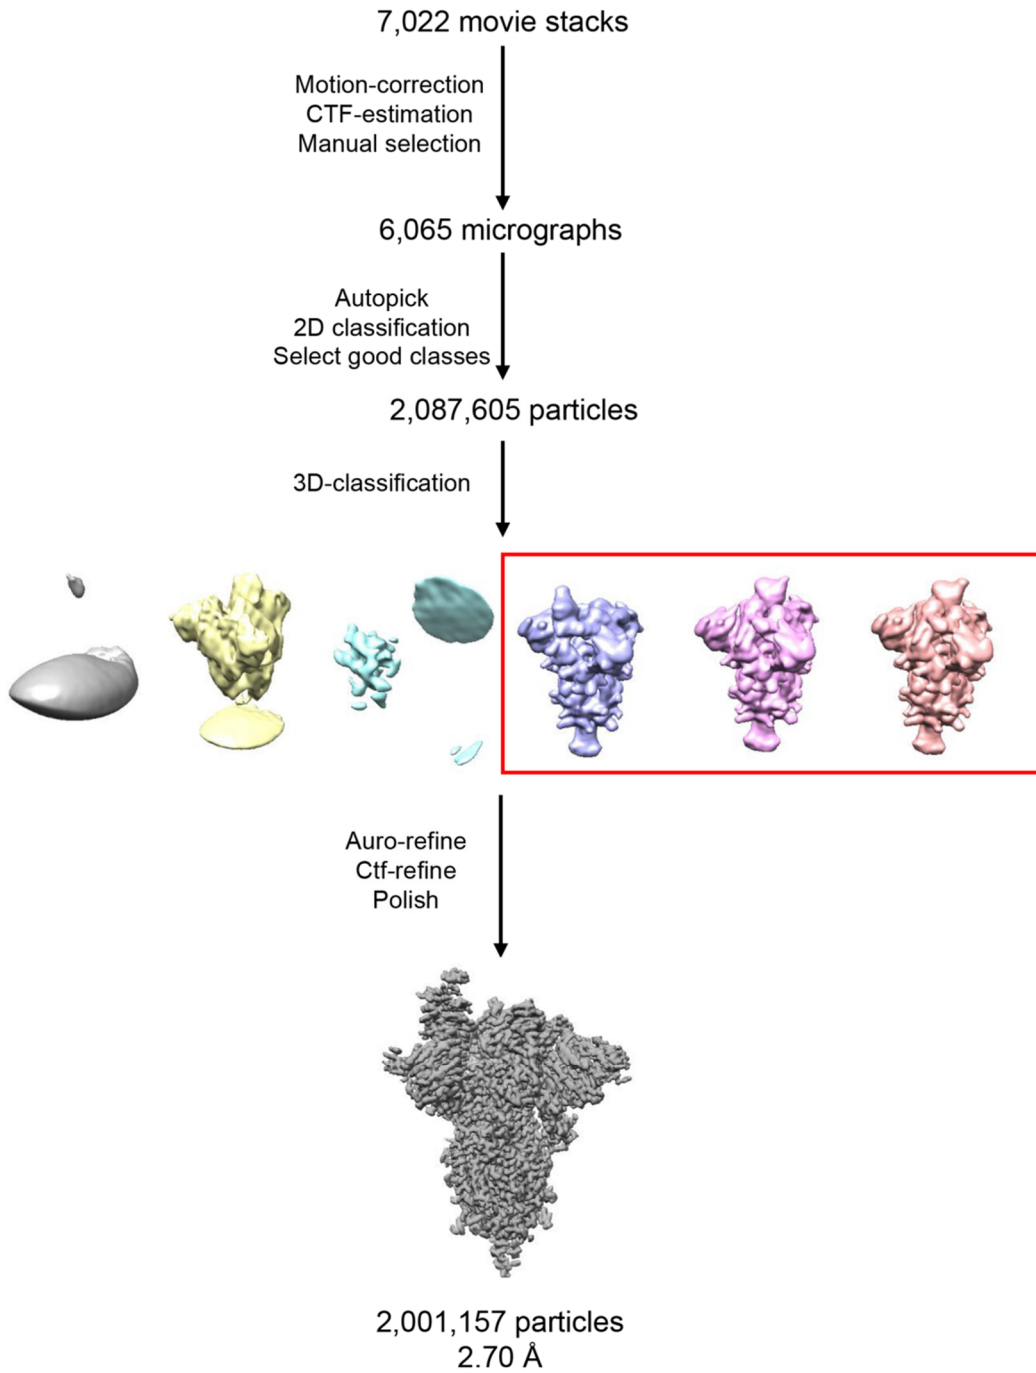

**FIG S6 Data processing flowchart of SARS-CoV-2 D614G apo S trimer.**

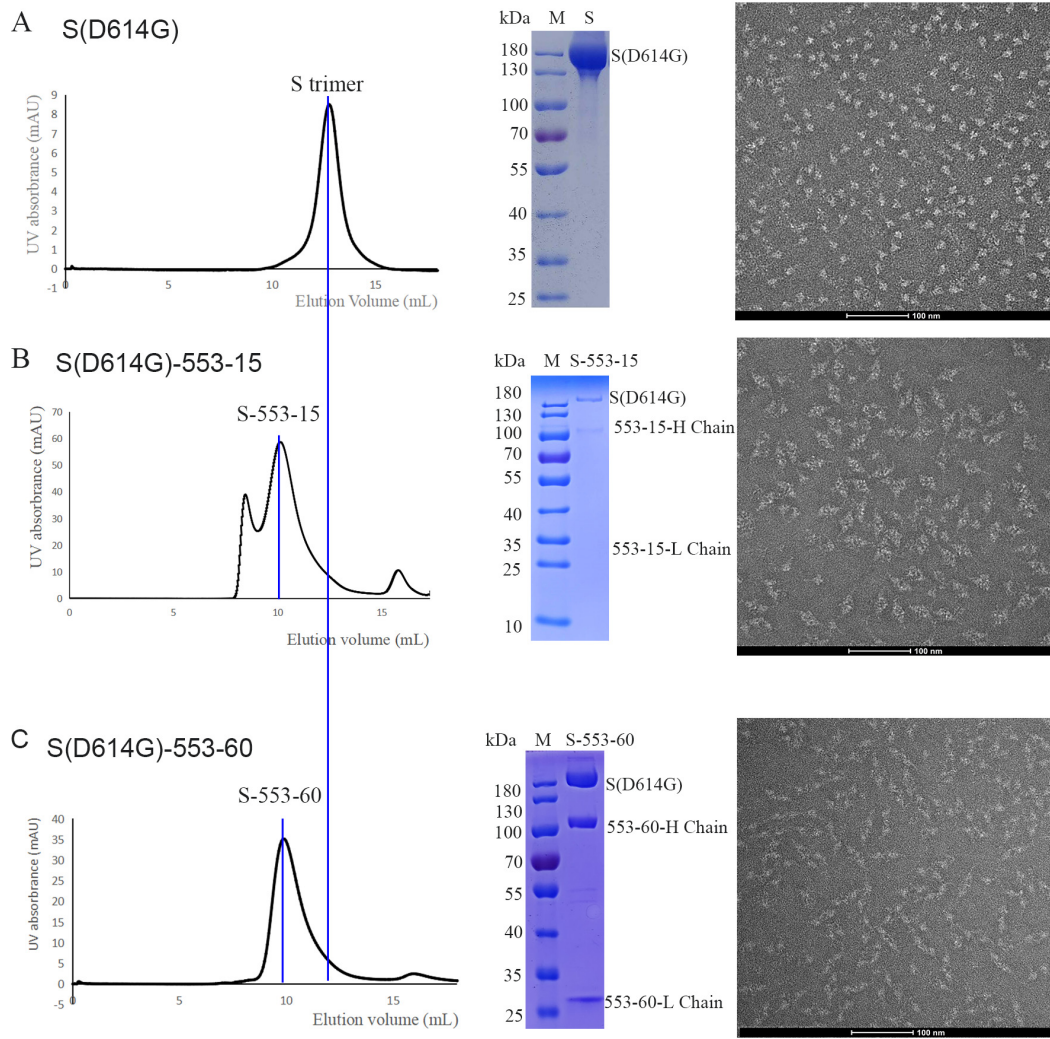

**FIG S7 Sample purification.** (A-B) Purification and negative stain images of S and S-553-15 complex. (C) Purification and negative stain images of S-553-60 complex. The vertical blue lines marked the peak fraction that was imaged in the gels. The negative stain images show that binding of 553-15 and 553-60 induced S trimer crosslinking of spike trimers.



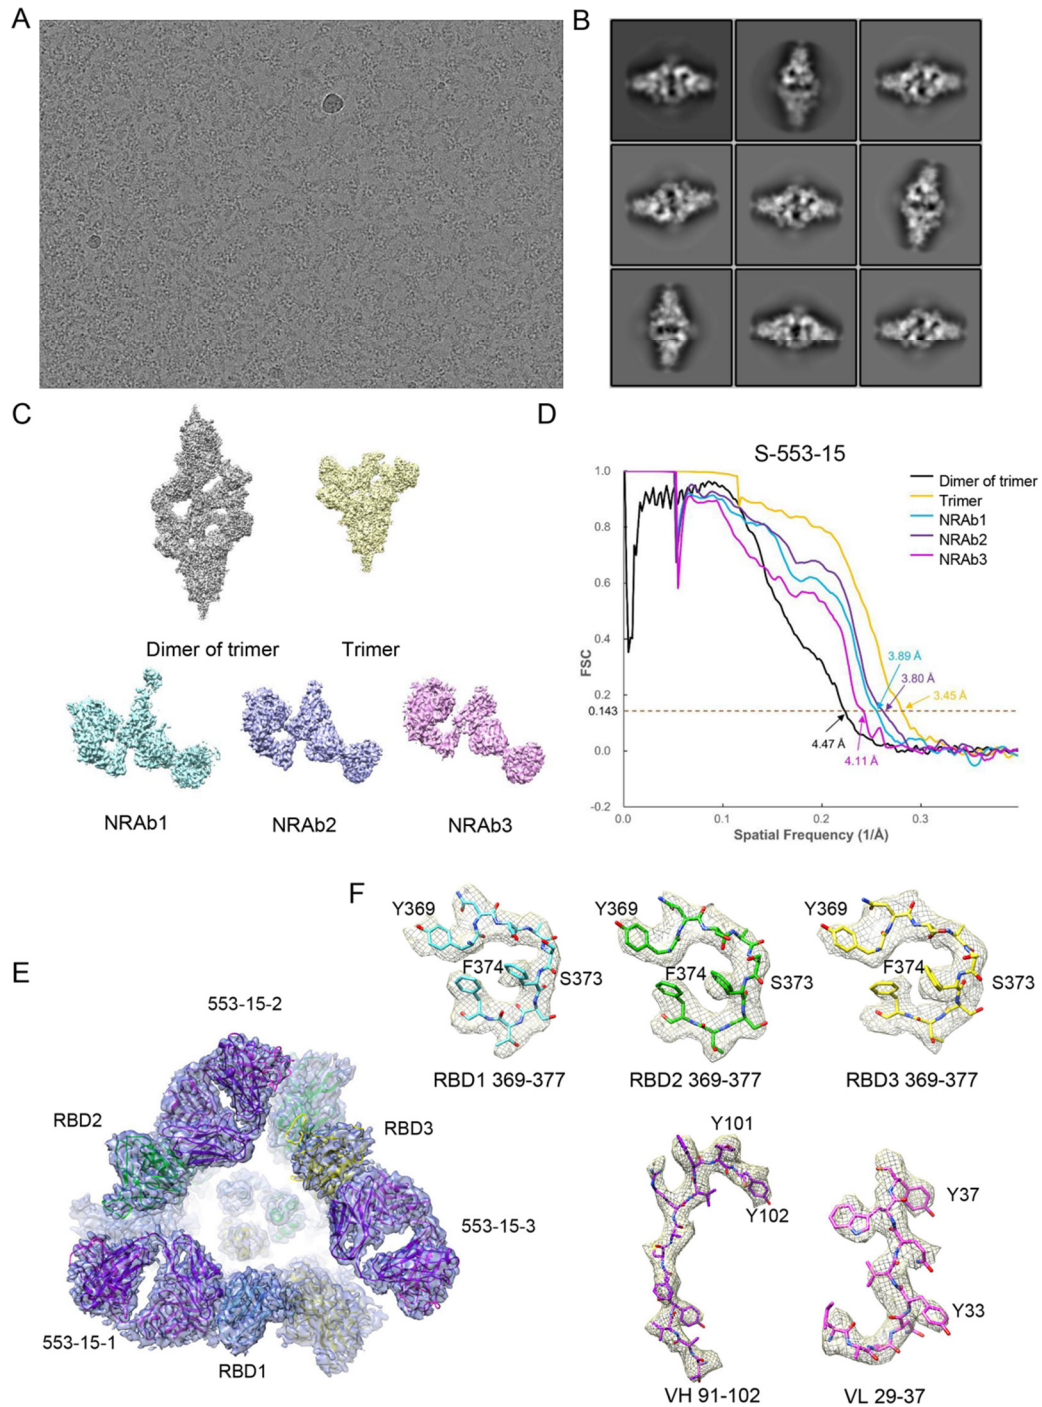

**FIG S8 Cryo-EM data processing of SARS-CoV-2 D614G S complexed with 553-15 (S-553-15).** (A) Representative electron micrograph of S-553-15. (B) 2D classification results of S-553-15. (C) The reconstruction map of dimer of trimer, trimer, and three local refinement maps. (D) Gold-standard FSC for each structure. The 0.143 cut-off is indicated by a horizontal dashed line. (E) Cryo-EM map of S-553-15 fitted with S-553-15 model. (F) Density maps of residues around the interface.

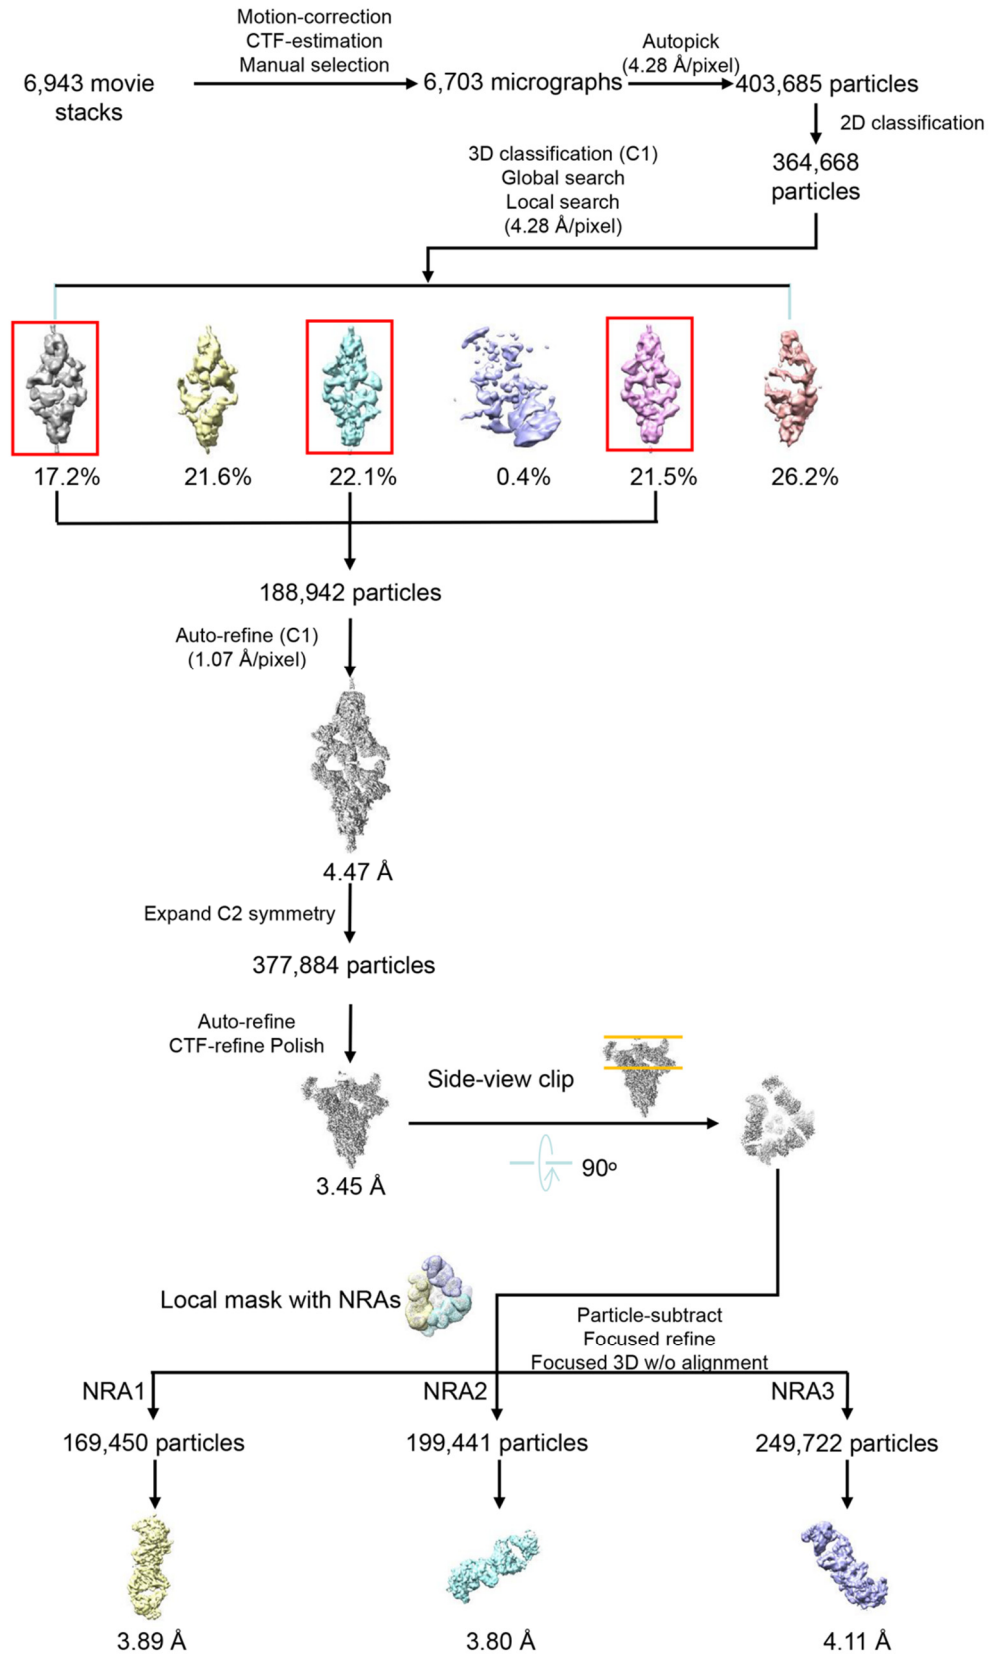

**FIG S9 Data processing flowchart of S-553-15.**

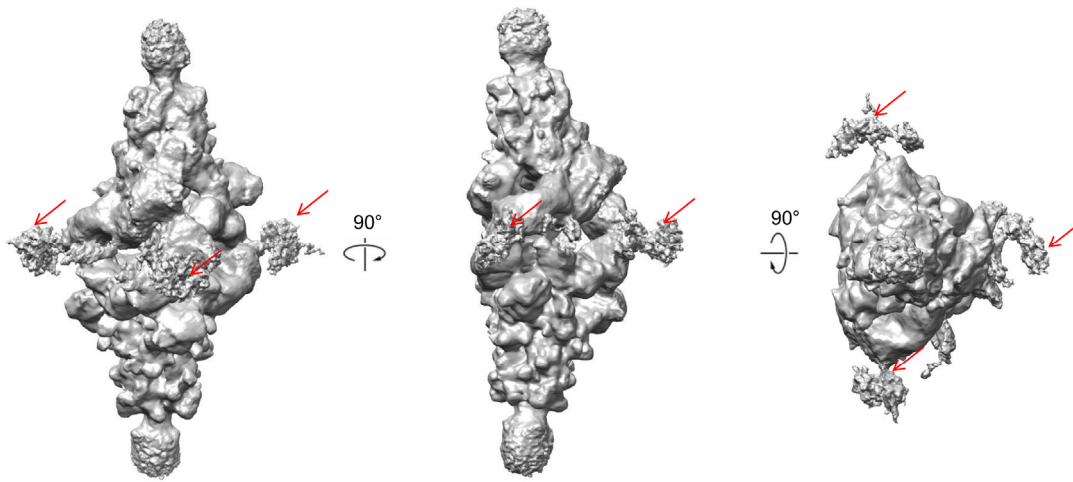

**FIG S10 Fc domains of IgG 553-15 indicated in the cryo-EM map of S-553-15. Fc density is visible when map is displayed at lower contour level in Chimera.**

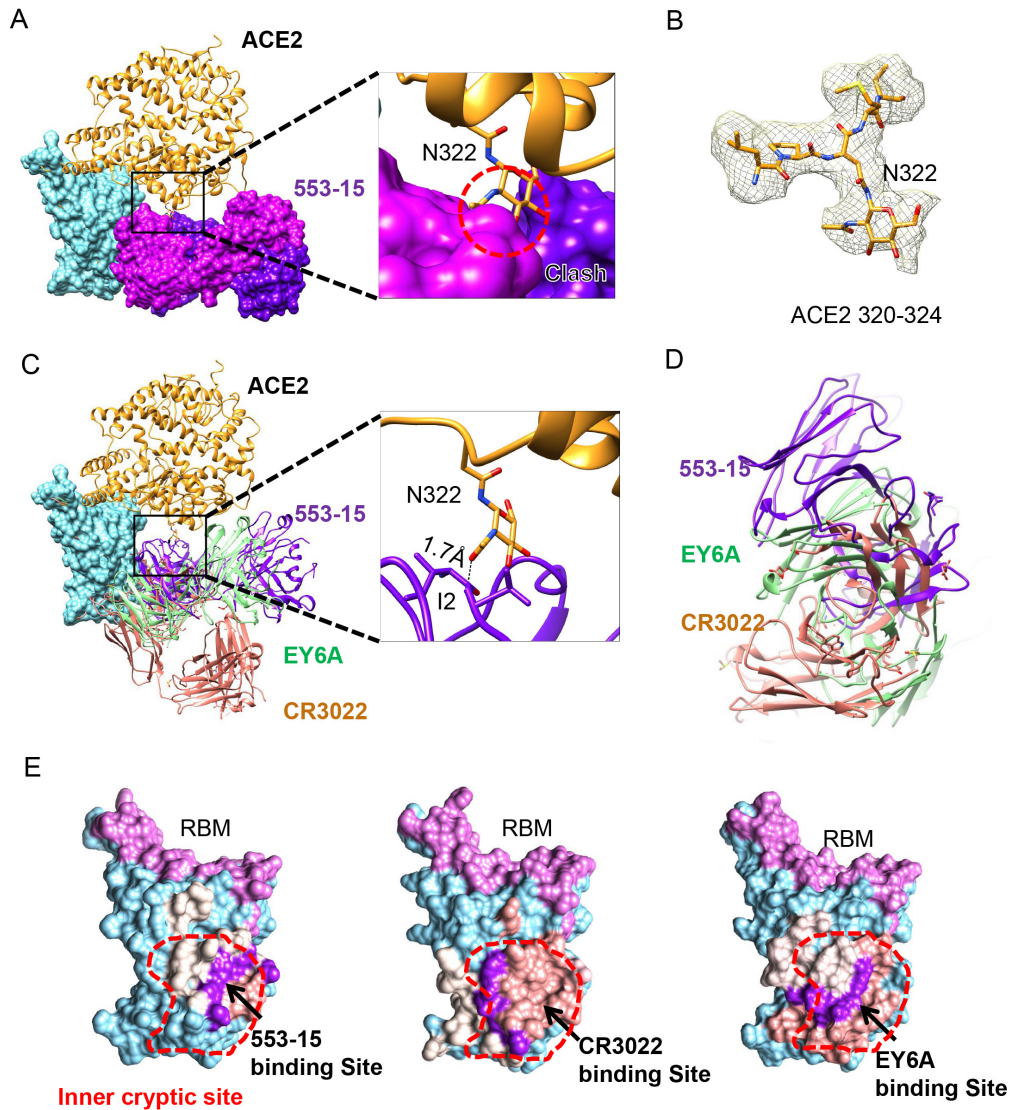

**FIG S11 Comparison of 553-15, CR3022, EY6A and their epitopes on the RBDs of SARS-CoV-2 S.** (A) Superposition of RBD-553-15 with RBD-ACE2 (PDBID: 6M17) showing that ACE2 would clash with 553-15. RBD and 553-15 Fab are displayed in surface. (B) Density map for N-glycan at site N322 of ACE2. (C) Comparison of Fab 553-15, EY6A and CR3022 upon binding to RBD, showing that 553-15 is closer to ACE2 N322 than EY6A (PDBID: 6ZDG) and CR3022 (PDBID: 6W41). (D) A close view of 553-15, EY6A, and CR3022 upon binding to RBD. (E) Surface representation of RBD showing the buried regions by 553-15, CR3022 and EY6A, respectively. Salmon presents VH-interacting regions, light gray presents VL-interacting regions, and purple presents the regions interacting with both VH and VL. Red dotted line indicates the inner cryptic site.

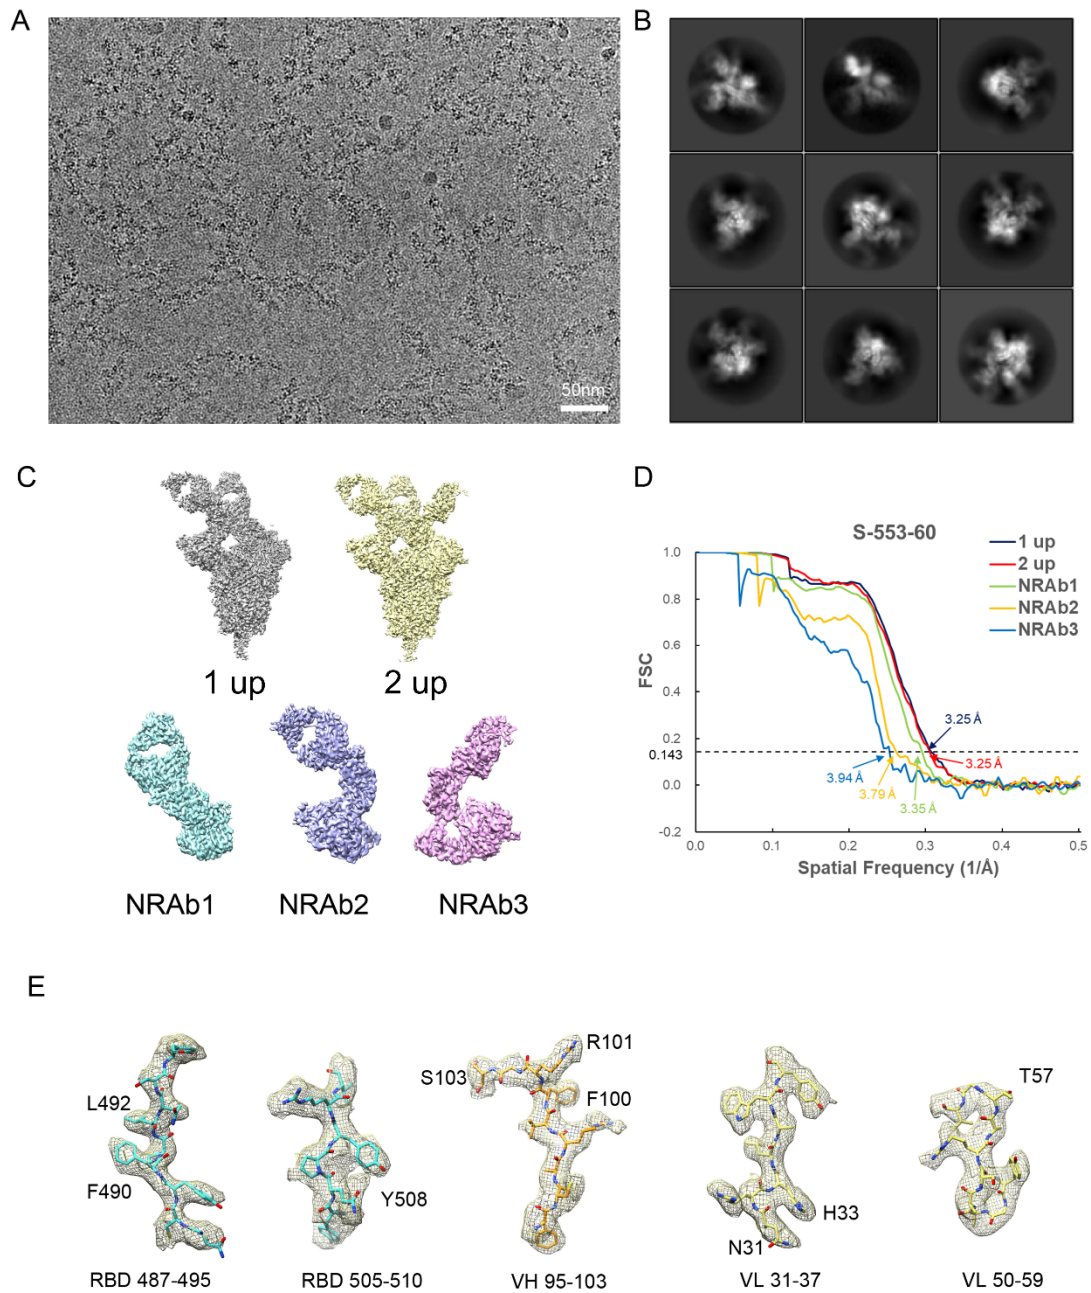

**FIG S12 Cryo-EM data processing of SARS-CoV-2 D614G S complexed with 553-60 (S-553-60).** (A) Representative electron micrograph of S-553-60. (B) 2D classification results of S-553-60. (C) The reconstruction maps of S-553-60 at two states and three locally refined maps. (D) Gold-standard FSC curves for each structure. The 0.143 cut-off is indicated by a horizontal dashed line. (E) Density maps of residues around the interface.

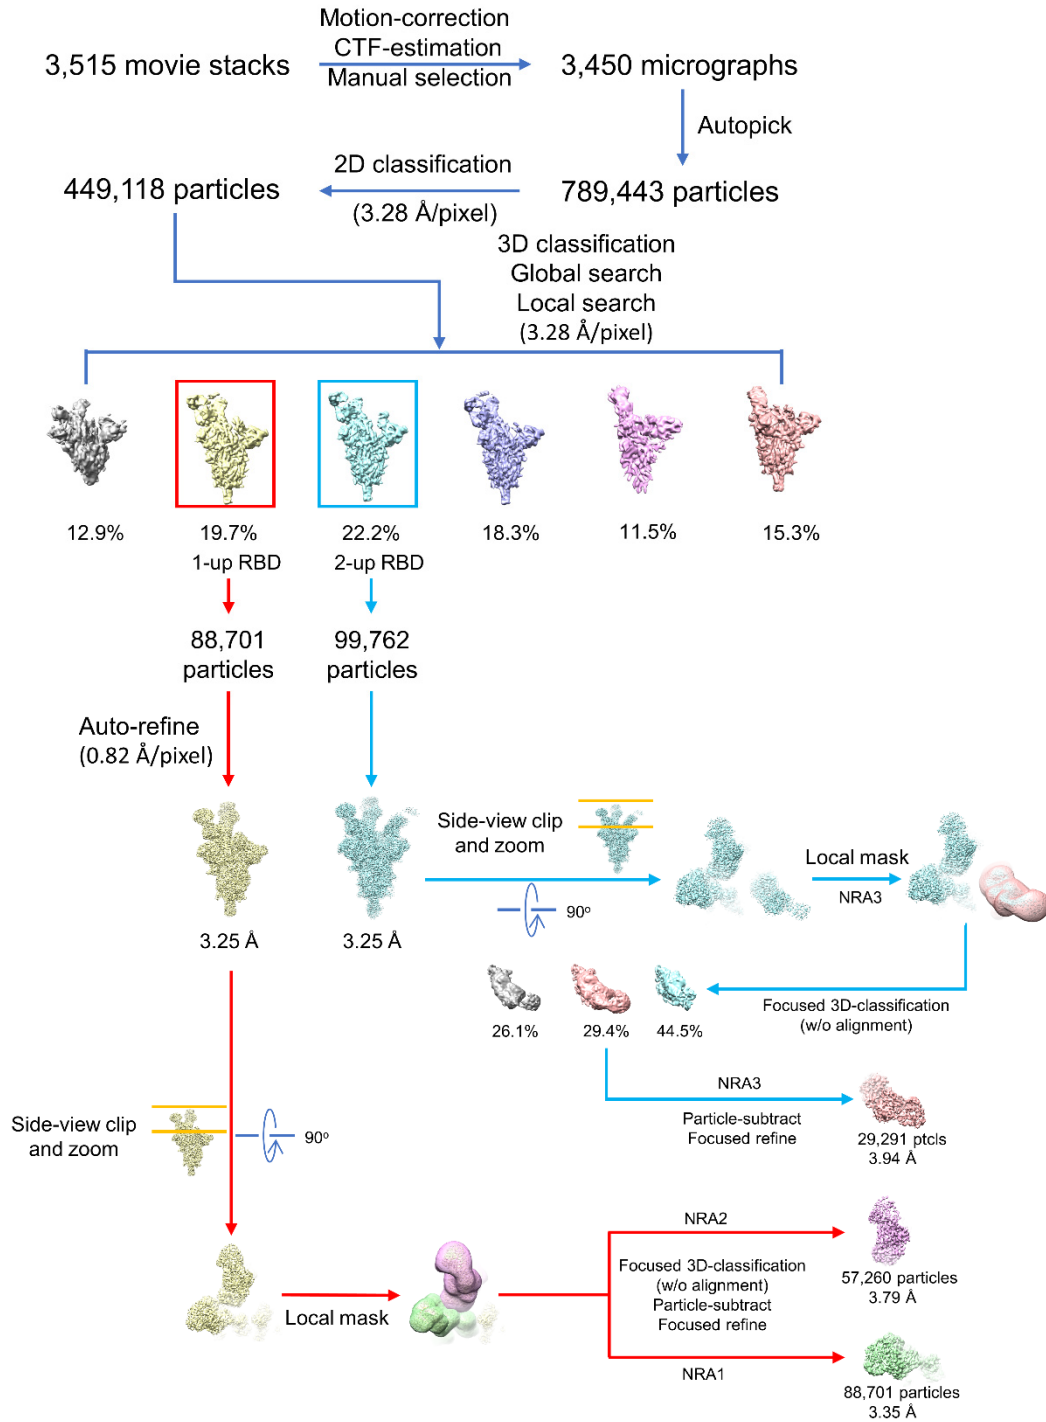

**FIG S13 Data processing flowchart of S-553-60.**

**Movie 1 The cryo-EM structure of SARS-CoV-2 D614G S in complex with IgG**

**553-15.** Molecular surface representation of S-553-15 complex is displayed. The dimer was formed by two S trimers with different pseudo-3-fold rotational symmetry axis. All RBDs are open.
